# Supplementary material for: Hydrogen storage characteristics of Li and Na decorated 2D boron phosphide
Source: Royal Society of Chemistry journal article supplement (doi:10.1039/d0se00709a), 2020-01-01
Supplement: d0se00709a1.pdf [file d0se00709a1.pdf]

## Electronic supplementary information (ESI)

# Hydrogen storage characteristics of Li and Na decorated 2D Boron Phosphide

Nabil Khossossi,<sup>\*1,2</sup> Younes Benhouria,<sup>2</sup> Syeda R. Naqvi,<sup>\*1</sup> Pritam K. Panda,<sup>1</sup> Ismail Essaoudi,<sup>1,2</sup>  
Abdelmajid Ainane,<sup>1,2,4</sup> Rajeev Ahuja<sup>\*,1,3</sup>

<sup>1</sup> *Condensed Matter Theory Group, Department of Physics and Astronomy, Uppsala  
University, 75120 Uppsala, Sweden*

<sup>2</sup> *Laboratoire de Physique des Matériaux et Modélisations des Systèmes, (LP2MS),  
Moulay Ismail University, Faculty of Sciences,  
Department of Physics, B.P. 11201, Meknes, Morocco*

<sup>3</sup> *Applied Materials Physics, Department of Materials and Engineering, Royal  
Institute of Technology (KTH), S-100 44 Stockholm, Sweden*

*and*

<sup>4</sup> *Max-Planck-Institut für Physik Complexer Systeme, NöthnitzerStr. 38, D-01187  
Dresden, Germany*

*\*) Corresponding author: nabil.khossossi@physics.uu.se; rabab.naqvi@physics.uu.se;  
Rajeev.ahuja@physics.uu.se*

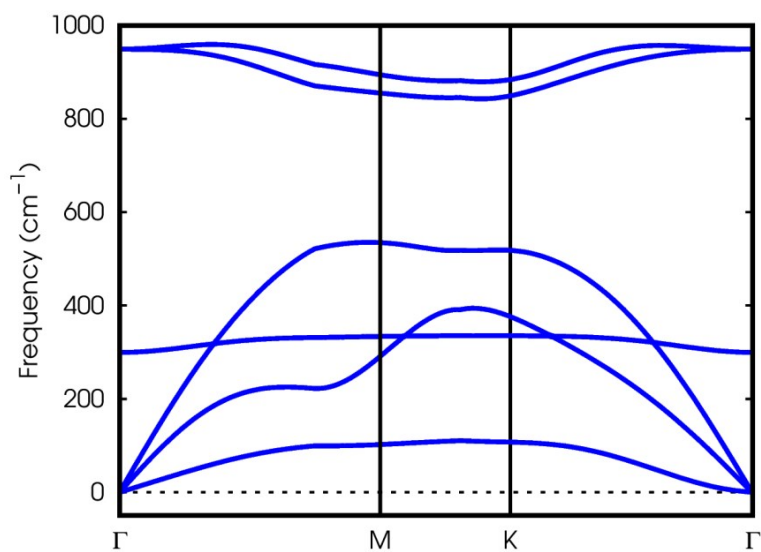

**Figure S1.** Dynamical stability of 2D BP monolayer, the phonon dispersion pattern along the k-vectors with high symmetry.

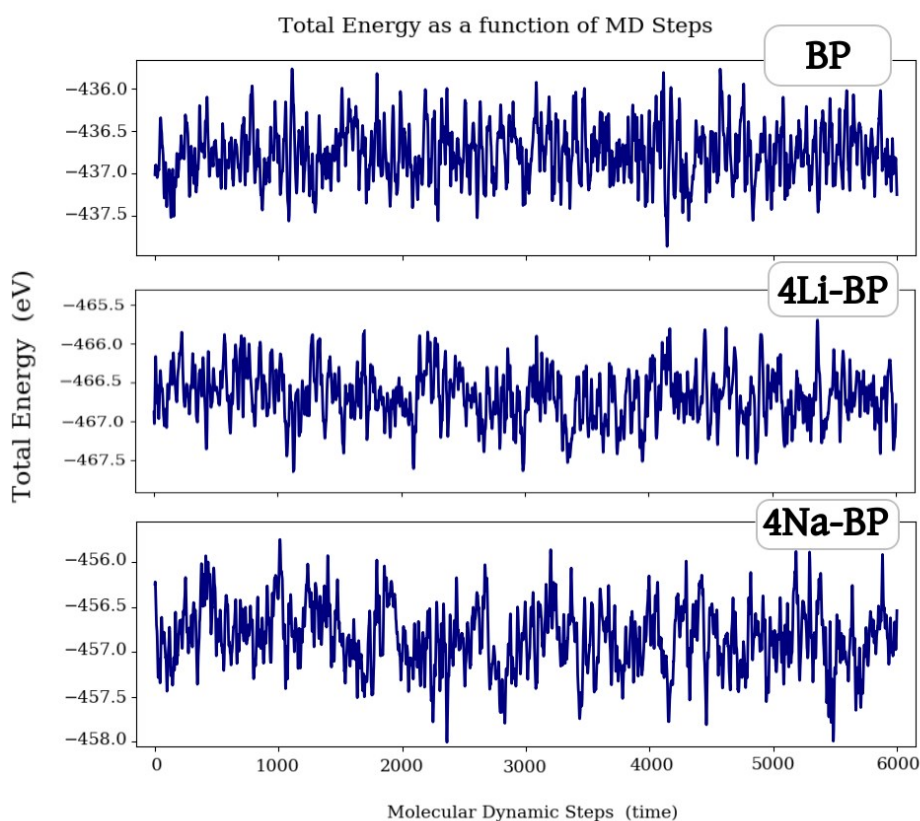

**Figure S2.** Thermal stability of 2D BP, 4Li@BP and 4Na@BP monolayers, the variation of the total-energy between 0 and 6 ps during the ab-initio molecular dynamics (AIMD) simulations at room temperature.
